# Supplementary material
Source: Springer Nature journal article supplement (https://www.springermedizin.de/resource/supplementary/12955_2007_412_MOESM1_ESM.pdf/9560338)

**Factor 2: Independence from glasses (6%)**

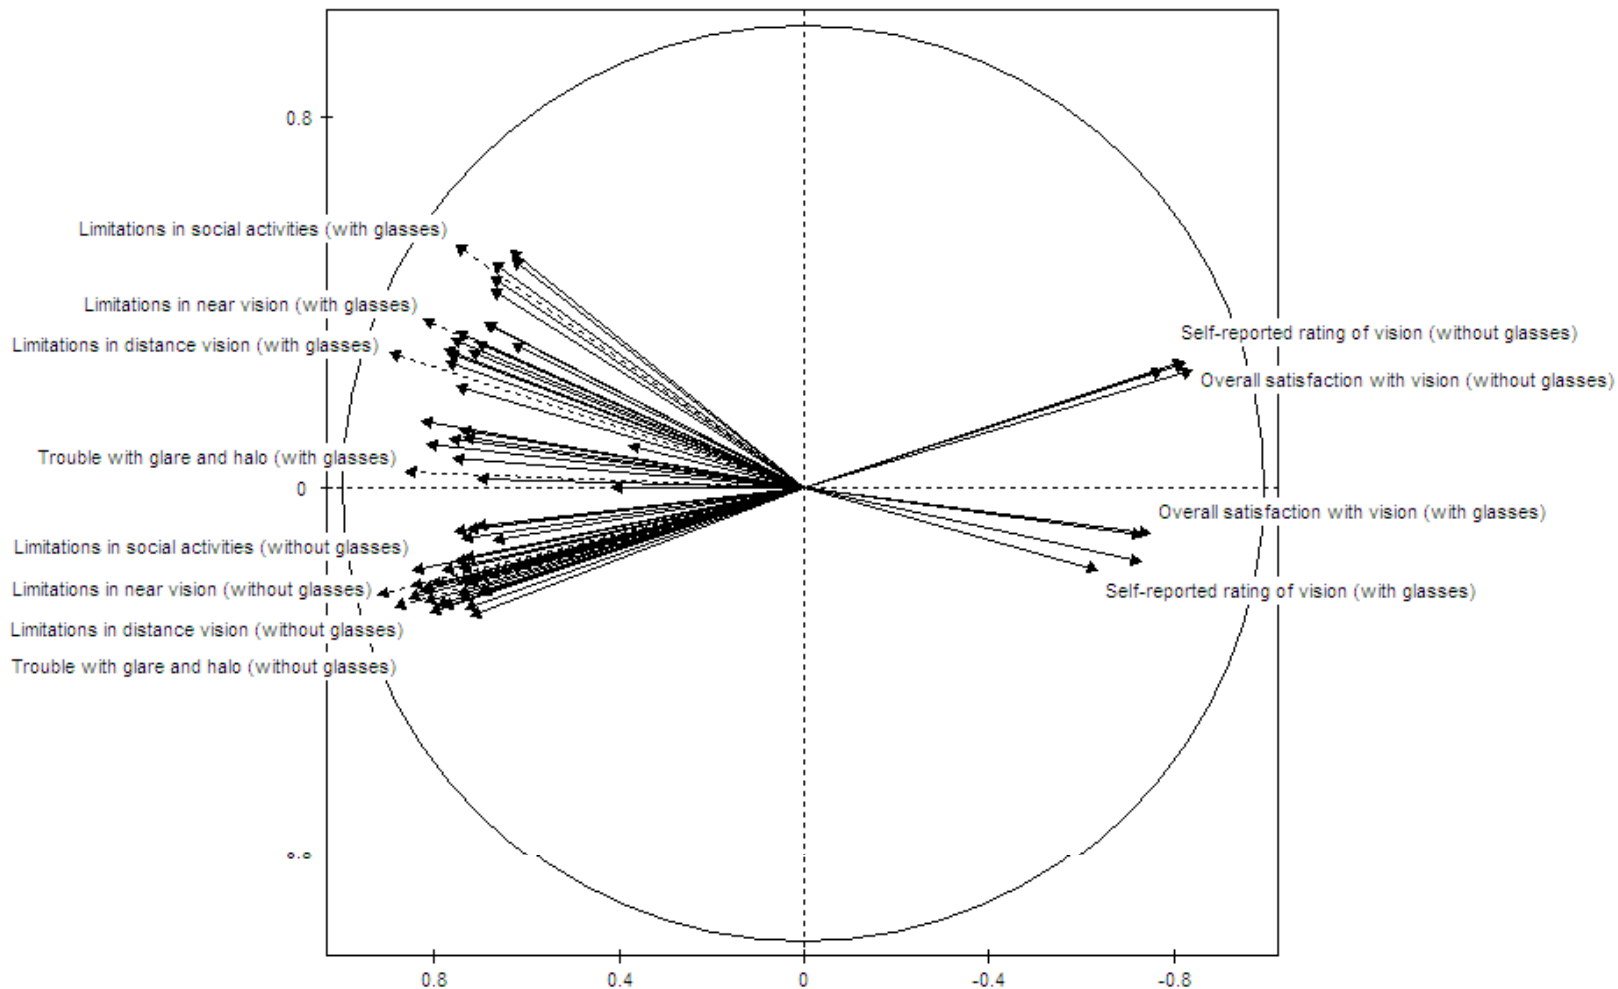

**Factor 1: Visual functioning and patient satisfaction (55%)**

Supplement: MOESM1 [file 9560338]
